# Supplementary material for: Assessment of carbonaceous aerosols in Shanghai, China – Part 1: long-term evolution, seasonal variations, and meteorological effects
Source: Copernicus journal article supplement (doi:10.5194/acp-17-9945-2017), 2017-08-25
Supplement: Supplementary file 1 [file acp-17-9945-2017-supplement.pdf]

Supplement of Atmos. Chem. Phys., 17, 9945–9964, 2017  
<https://doi.org/10.5194/acp-17-9945-2017-supplement>  
© Author(s) 2017. This work is distributed under  
the Creative Commons Attribution 3.0 License.

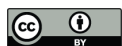

*Supplement of*

## **Assessment of carbonaceous aerosols in Shanghai, China – Part 1: long-term evolution, seasonal variations, and meteorological effects**

**Yunhua Chang et al.**

*Correspondence to:* Yanlin Zhang (dryanlinzhang@outlook.com, yanlinzhang@nuist.edu.cn)  
and Yunhua Chang (changy13@fudan.edu.cn, changy13@nuist.edu.cn)

The copyright of individual parts of the supplement might differ from the CC BY 3.0 License.

## **This file includes:**

### **Figures**

Fig. S1 Location of the Pudong Environmental Monitoring Center (PEMC) supersite in Shanghai (Chang et al., Atmos. Chem. Phys., 16, 3577-3594, doi:10.5194/acp-16-3577-2016, 2016). The left panel shows various types of land use in eastern and southern China. The red areas and black lines in the right panel represent the urban areas and main roads in Shanghai, respectively.

Figure S2. Long-term evolution of annual emissions (green areas; right y axis, unit:  $10^4$  metric ton) and concentrations of  $\text{SO}_2$  (left y axis, unit:  $\mu\text{g m}^{-3}$ ) in Shanghai. The blue lines indicate the annual  $\text{SO}_2$  concentrations (left y axis, unit:  $\mu\text{g m}^{-3}$ ) measured at Pudong supersite, and the lowest and highest of the vertical line representing the 5<sup>th</sup> and 95<sup>th</sup> percentiles, respectively.

Figure S3. Daily traffic flow during four seasons in Shanghai main streets. The original data was collected by Shanghai Traffic Administration Bureau, and provided by Prof. Yan Zhang at Fudan University.

Fig. S4 Bivariate polar plots of seasonal OC concentrations ( $\mu\text{g m}^{-3}$ ) in Shanghai between July 2010 and December 2014. The center of each plot represents a wind speed of zero, which increases radially outward. The concentration of OC is shown by the color scale.

Fig. S5 Bivariate polar plots of seasonal OC/EC ratios in Shanghai between July 2010 and December 2014. The center of each plot represents a wind speed of zero, which increases radially outward. The ratio of OC/EC is shown by the color scale.

### **Tables**

Table S1 Ambient concentrations of carbonaceous aerosols measured in Shanghai, China.

## Figures

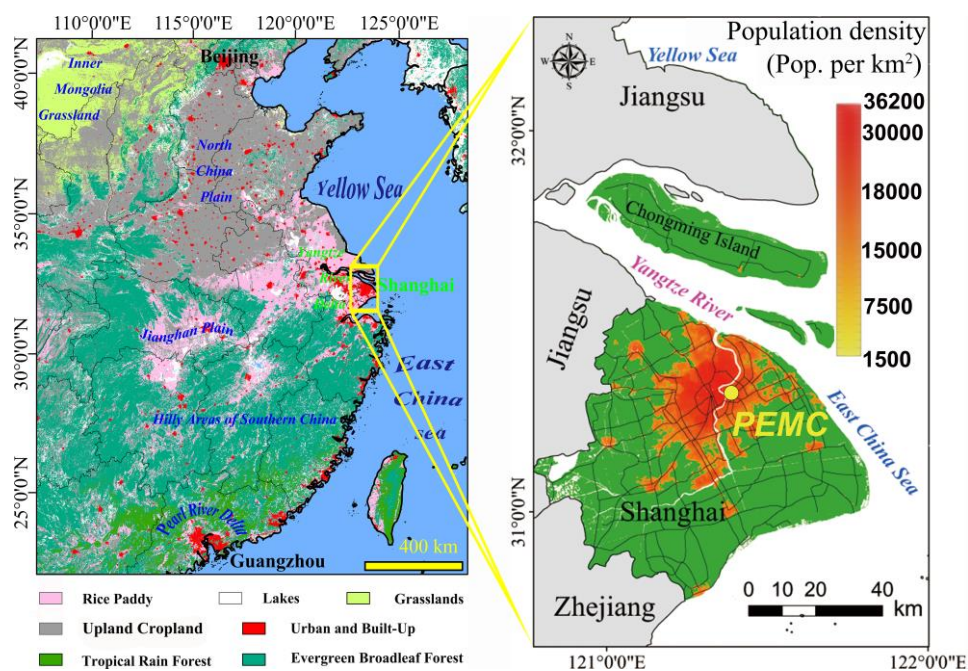

**Figure S1.** Location of the Pudong Environmental Monitoring Center (PEMC) supersite in Shanghai (Chang et al., Atmos. Chem. Phys., 16, 3577-3594, doi:10.5194/acp-16-3577-2016, 2016). The left panel shows various types of land use in eastern and southern China. The red areas and black lines in the right panel represent the urban areas and main roads in Shanghai, respectively.

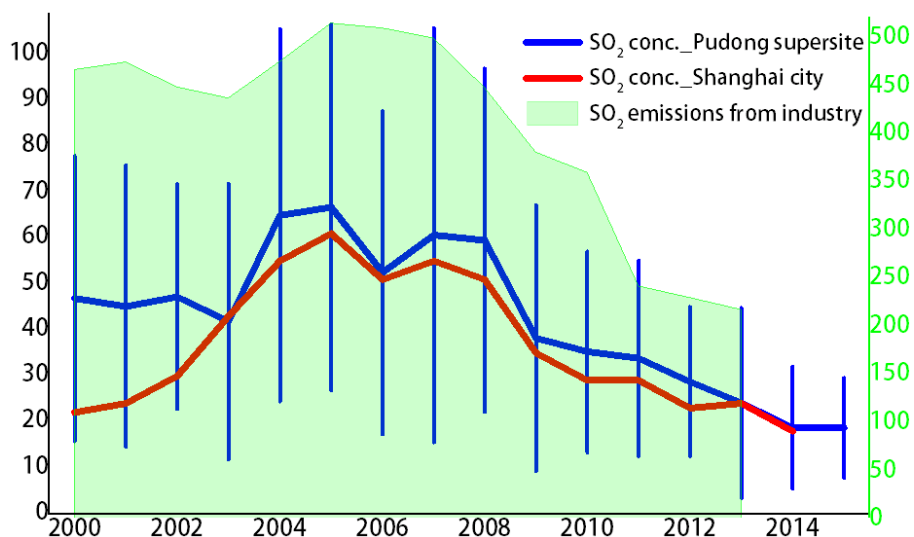

**Figure S2.** Long-term evolution of annual emissions (green areas; right y axis, unit: 10<sup>4</sup> metric ton) and concentrations of SO<sub>2</sub> (left y axis, unit: µg m<sup>-3</sup>) in Shanghai. The blue lines indicate the annual SO<sub>2</sub> concentrations (left y axis, unit: µg m<sup>-3</sup>) measured at Pudong supersite, and the lowest and highest of the vertical line representing the 5<sup>th</sup> and 95<sup>th</sup> percentiles, respectively.

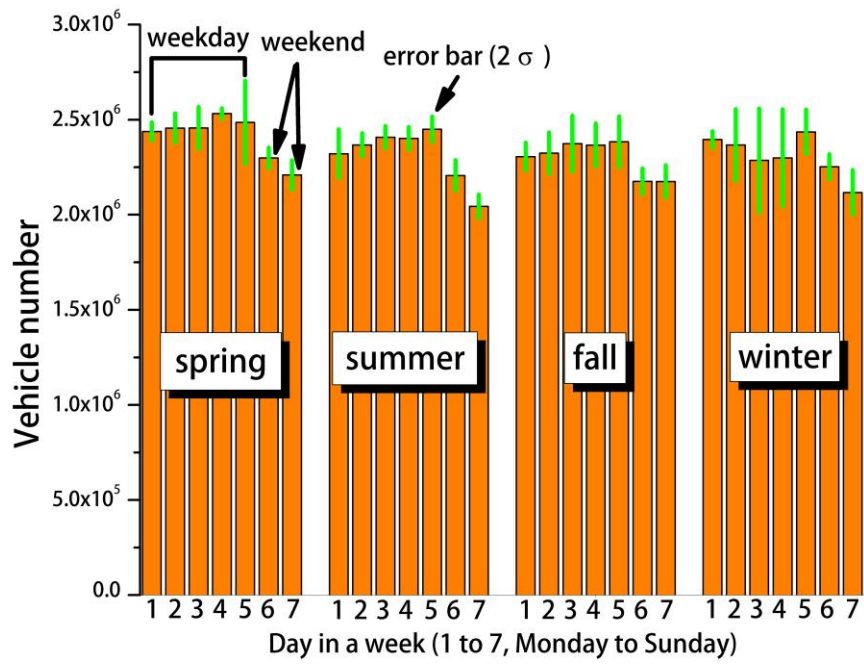

**Figure S3.** Daily traffic flow during four seasons in Shanghai main streets. The original data was collected by Shanghai Traffic Administration Bureau.

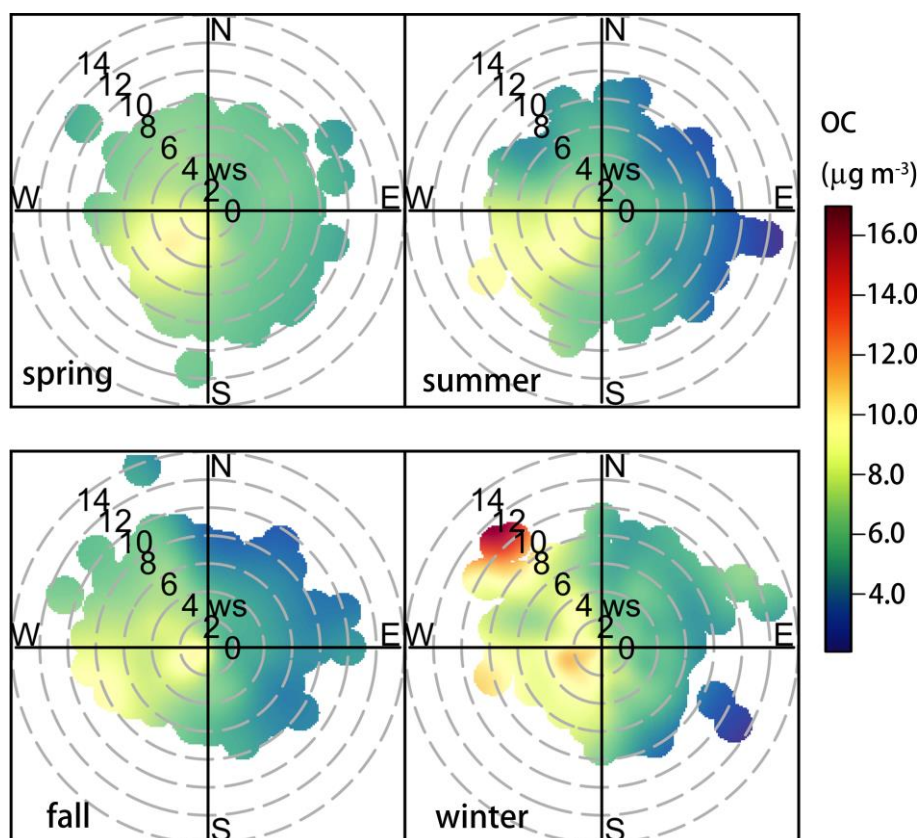

**Figure S4.** Bivariate polar plots of seasonal OC concentrations ( $\mu\text{g m}^{-3}$ ) in Shanghai between July 2010 and December 2014. The center of each plot represents a wind speed of zero, which increases radially outward. The concentration of OC is shown by the color scale.

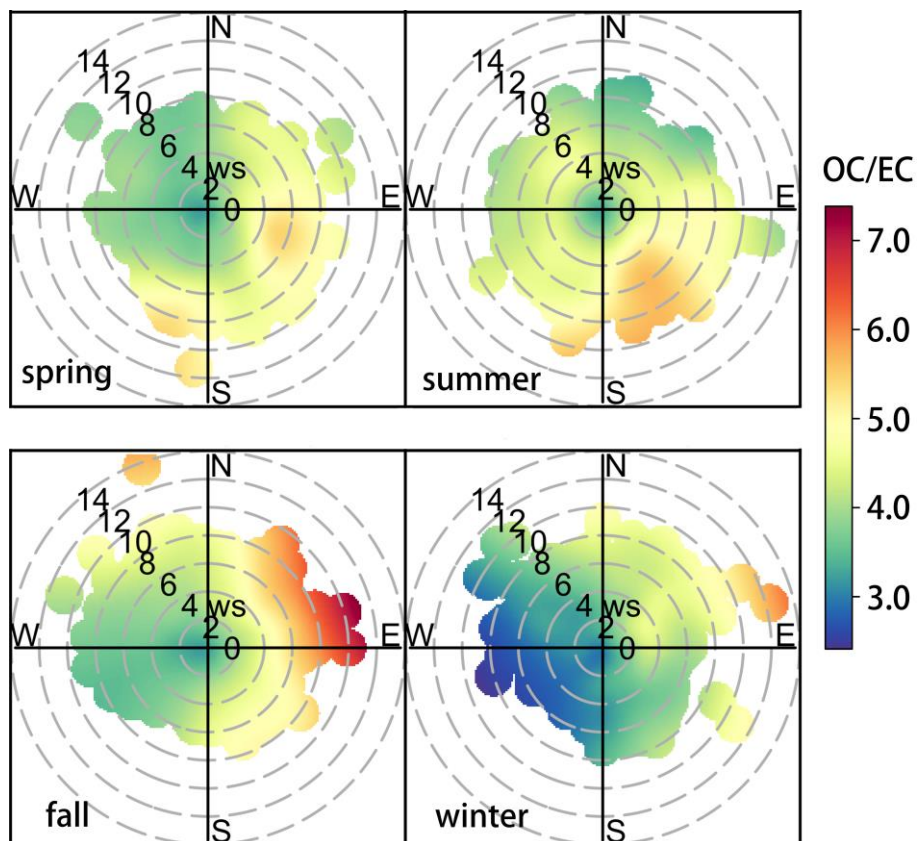

**Figure S5.** Bivariate polar plots of seasonal OC/EC ratios in Shanghai between July 2010 and December 2014. The center of each plot represents a wind speed of zero, which increases radially outward. The ratio of OC/EC is shown by the color scale.

Table S1. Ambient concentration ( $\mu\text{g m}^{-3}$ ) of carbonaceous aerosols measured in Shanghai, China.

| Site name                                | type     | Latitude   | Longitude   | a.g.l (m) | Sampling period      | OC    | EC   | Reference |
|------------------------------------------|----------|------------|-------------|-----------|----------------------|-------|------|-----------|
| Tongji University campus                 | Urban    | 37°11'13"N | 121°29'58"E | 16        | 20/3/1999-27/3/2000  | 14.34 | 6.21 | 1         |
| Hainan Road                              | Urban    | 31°15'13"N | 121°29'11"E | 18        | 5/5/1999-20/3/2000   | 15.43 | 6.77 | 1         |
| Tongji University campus                 | Urban    | 37°11'13"N | 121°29'58"E | 16        | 3/1999-3/2000        | 14.6  | 6.1  | 2         |
| Hainan Road                              | Urban    | 31°15'13"N | 121°29'11"E | 18        | 3/1999-3/2000        | 14.6  | 6.1  | 2         |
| Yanchang campus of Shanghai University   | Urban    | 31°16'43"N | 121°27'11"E | 25        | 10/2005-1,4,7/2006   | 14.7  | 2.8  | 3         |
| Jiading Environmental Monitoring Station | Suburban | 31°23'02"N | 121°15'09"E | 10        | 10/2005-1,4,7/2006   | 17.5  | 3    | 3         |
| Pudong Environmental Monitoring Station  | Urban    | 31°13'34"N | 121°32'19"E | 18        | 19/4/2007-31/12/2008 |       | 3.9  | 4         |

Reference 1: Ye, B., Ji, X., Yang, H., Yao, X., Chan, C. K., Cadle, S. H., Chan, T., and Mulawa, P. A.: Concentration and chemical composition of PM<sub>2.5</sub> in Shanghai for a 1-year period, *Atmospheric Environment*, 37, 499-510, 2003.

Reference 2: Yang, F., He, K., Ye, B., Chen, X., Cha, L., Cadle, S. H., Chan, T., and Mulawa, P. A.: One-year record of organic and elemental carbon in fine particles in downtown Beijing and Shanghai, *Atmospheric Chemistry and Physics*, 5, 1449-1457, 2005.

Reference 3: Feng, Y. L., Chen, Y. J., Guo, H., Zhi, G. R., Xiong, S. C., Li, J., Sheng, G. Y., and Fu, J. M.: Characteristics of organic and elemental carbon in PM<sub>2.5</sub> samples in Shanghai, China, *Atmospheric Research*, 92, 434-442, 2009.

Reference 4: Wang, X., Chen, R., Meng, X., Geng, F., Wang, C., and Kan, H.: Associations between fine particle, coarse particle, black carbon and hospital visits in a Chinese city, *The Science of the Total Environment*, 458-460, 1-6, 2013.
